# Supplementary material for: Climatology and interannual variability of dynamic variables in multiple reanalyses evaluated by the SPARC Reanalysis Intercomparison Project (S-RIP)
Source: Copernicus journal article supplement (doi:10.5194/acp-17-14593-2017), 2017-12-07
Supplement: Supplementary file 1 [file acp-17-14593-2017-supplement.pdf]

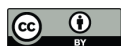

*Supplement of*

**Climatology and interannual variability of dynamic variables  
in multiple reanalyses evaluated by the SPARC Reanalysis  
Intercomparison Project (S-RIP)**

**Craig S. Long et al.**

*Correspondence to:* Craig S. Long ([craig.long@noaa.gov](mailto:craig.long@noaa.gov)) and Masatomo Fujiwara ([fuji@ees.hokudai.ac.jp](mailto:fuji@ees.hokudai.ac.jp))

The copyright of individual parts of the supplement might differ from the CC BY 3.0 License.

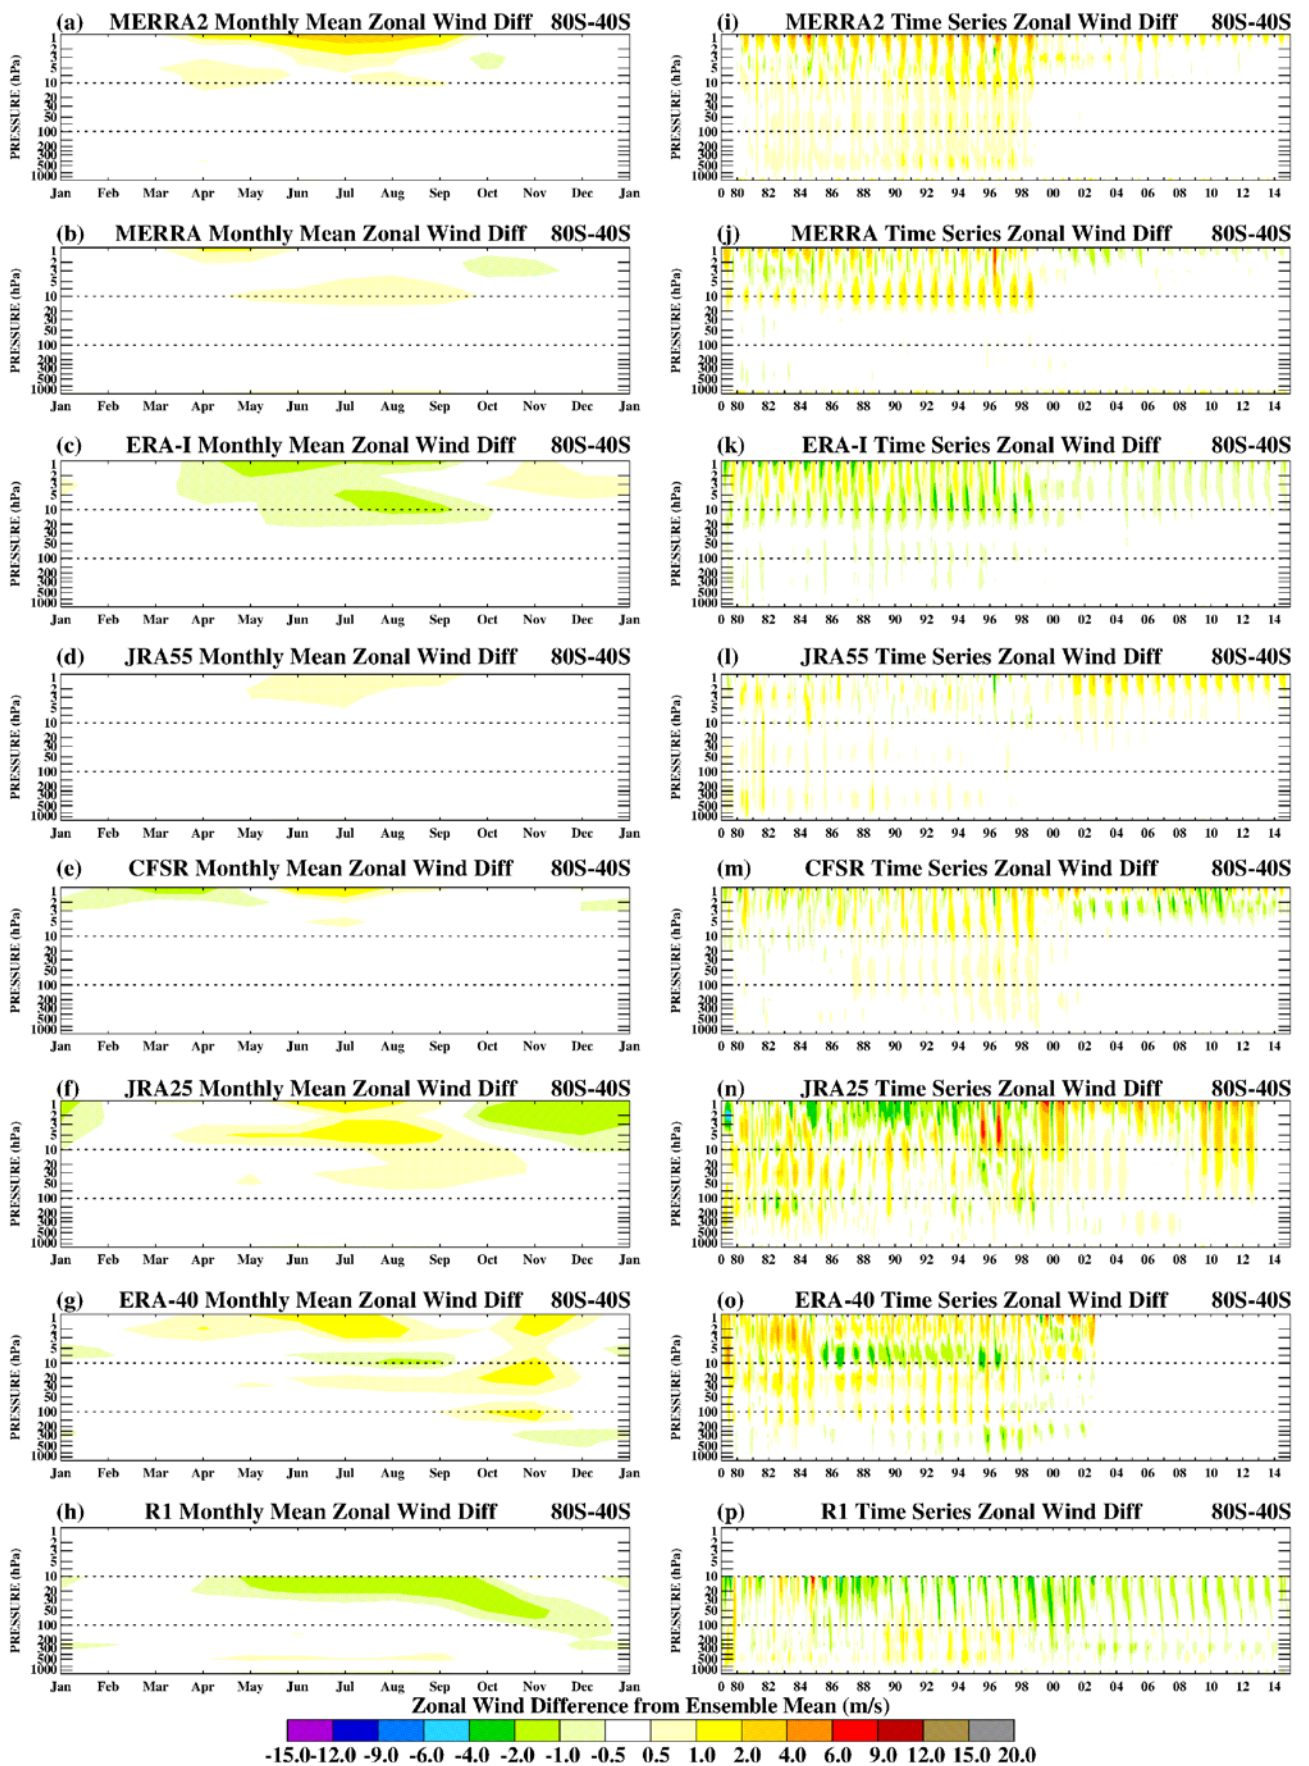

S1. Pressure vs month plots (left) and pressure vs time plots (right) of the zonal wind difference (m/s) of individual reanalyses from the REM from the zonal region  $80^{\circ}\text{S} - 40^{\circ}\text{S}$ . The reanalyses are a) MERRA-2, b) MERRA, c) ERA-I, d) JRA-55, e) CFSR, f) JRA-25, g) ERA-40, and h) R1.

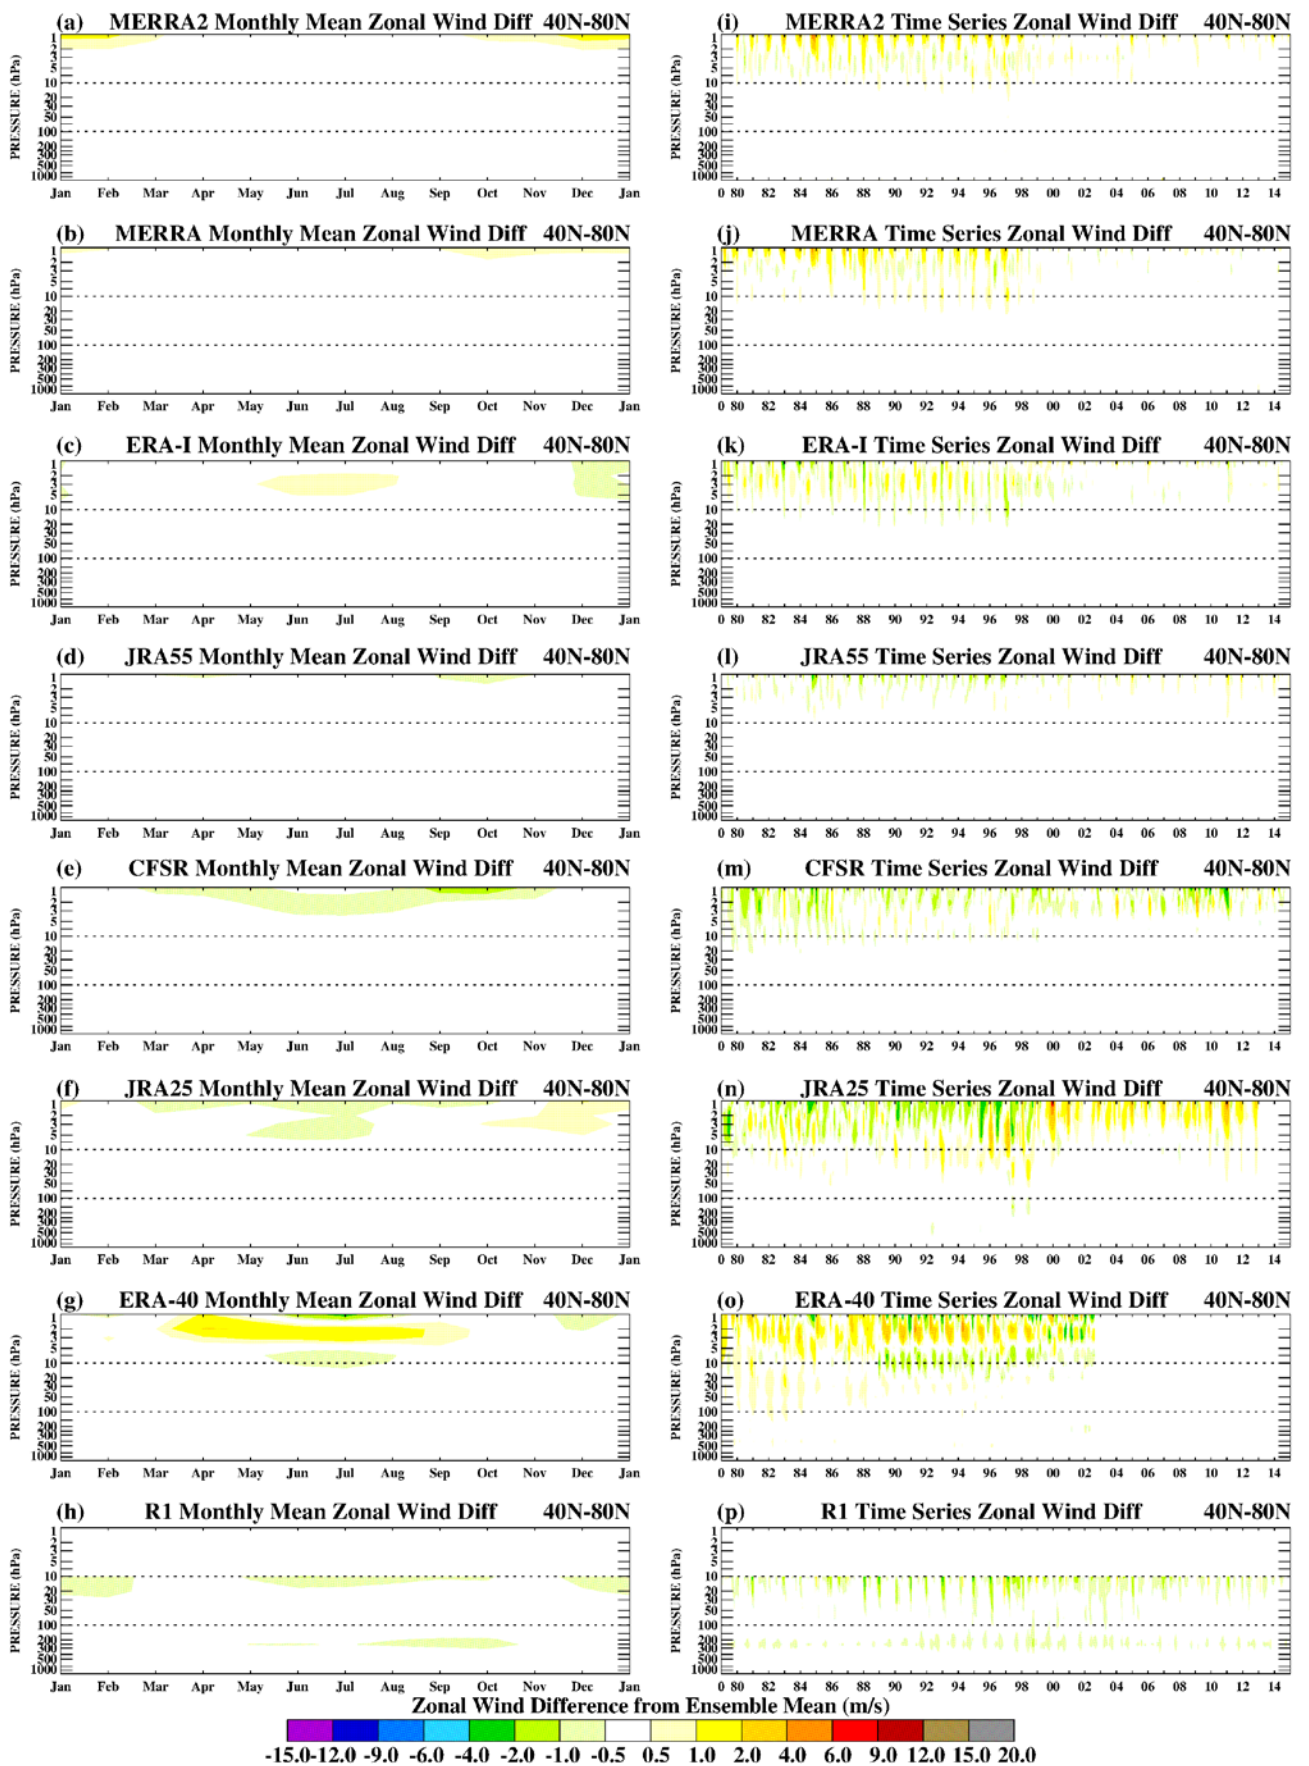

S2. Pressure vs month plots (left) and pressure vs time plots (right) of the zonal wind difference (m/s) of individual reanalyses from the REM from the zonal region  $40^{\circ}$  N –  $80^{\circ}$  N. The reanalyses are a) MERRA-2, b) MERRA, c) ERA-I, d) JRA-55, e) CFSR, f) JRA-25, g) ERA-40, and h) R1.
